# Supplementary material for: Dielectrophoretic trapping of nanosized biomolecules on plasmonic nanohole arrays for biosensor applications: simple fabrication and visible-region detection
Source: Royal Society of Chemistry journal article supplement (doi:10.1039/d3ra03245k), 2023-01-01
Supplement: d3ra03245k1.pdf [file d3ra03245k1.pdf]

## ELECTRONIC SUPPLEMENTARY INFORMATION

### Dielectrophoretic trapping of nanosized biomolecules on plasmonic nanohole arrays for biosensor applications: Simple fabrication and visible-region detection

Satoko Fujiwara,<sup>a</sup> Misaki Hata,<sup>b</sup> Ikumi Onohara,<sup>b</sup> Daiki Kawasaki,<sup>a</sup> Kenji Sueyoshi,<sup>a,c</sup> Hideaki Hisamoto,<sup>a</sup> Masato Suzuki,<sup>b</sup> Tomoyuki Yasukawa<sup>b</sup> and Tatsuro Endo<sup>\*a</sup>

<sup>a</sup>Department of Applied Chemistry, Graduate School of Engineering, Osaka Metropolitan University, 1-1 Gakuen-cho, Naka-ku, Sakai, Osaka 599-8531, Japan.

<sup>b</sup>Graduate School of Material Science, University of Hyogo, 3-2-1 Kouto, Kamigori, Ako, Hyogo 678-1297, Japan.

<sup>c</sup>Japan Science and Technology Agency (JST), Precursory Research for Embryonic Science and Technology (PRESTO) 4-1-8 Honcho, Kawaguchi, Saitama 332-0012, Japan.

<sup>d</sup>Advanced Medical Engineering Research Institute, University of Hyogo, Hyogo, Japan.

\* Corresponding author: Tatsuro Endo (t\_endo@omu.ac.jp)

Fig. S1: (a) Schematic of the optical setup used to measure the transmission spectra. (b) and (c) Overview images of the FDTD simulation model of the Au NHA.

Fig. S2: (a) Transmission spectra with respect to an *RI* change and EM fields of the Au NHA. (b) Peak and dip shifts with respect to the *RI* at 776 and 788 nm simulated using the FDTD method. □

Fig. S3: ES field of the Au NHA-based DEP device obtained using FEM: (a) perspective and *x-z* views, (b) electrostatic field intensity (*E*) versus distance (*d*) from the bottom of the Au layer.

Fig. S4: AFM images of the COP film and the fabricated Au NHA.

Fig. S5: Size distribution of the PS NPs measured using dynamic light scattering (DLS).

Fig. S6: SEM images of the trapped PS NPs by DEP after drying the sample dispersion.

Fig. S7: Calibration curve of the PS NPs trapped on the Au NHAs.

Fig. S8: SEM images of the trapped BSA by DEP after drying the sample solution.

Video S1: Fluorescence images obtained during PS NP trapping using the fabricated Au NHA-based DEP device.

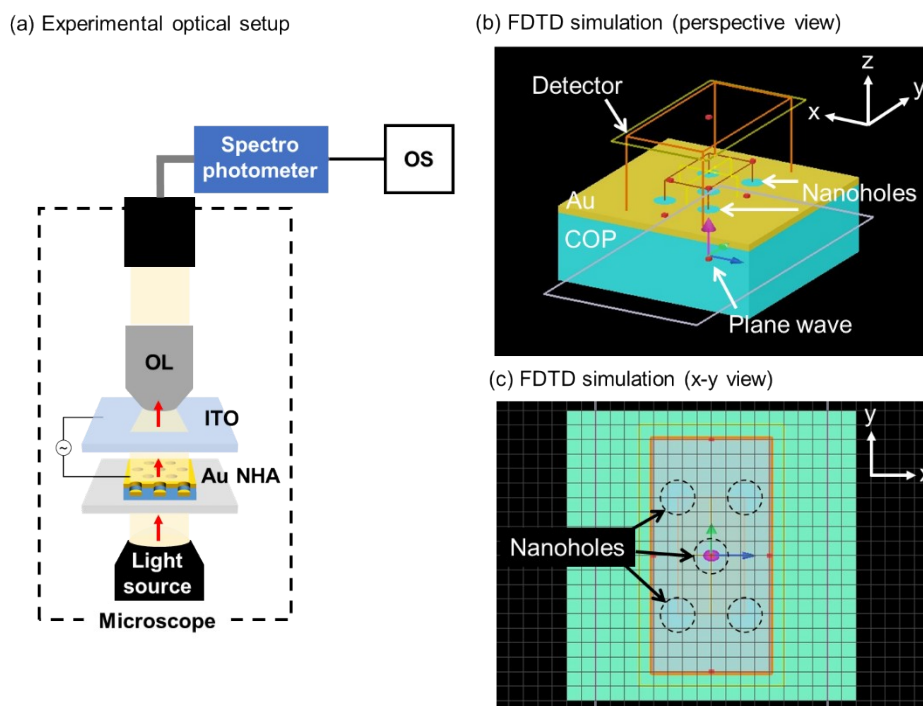

Fig. S1: (a) Schematic of the optical setup used to measure the transmission spectra. (b) and (c) Overview images of the FDTD simulation model of the Au NHA.

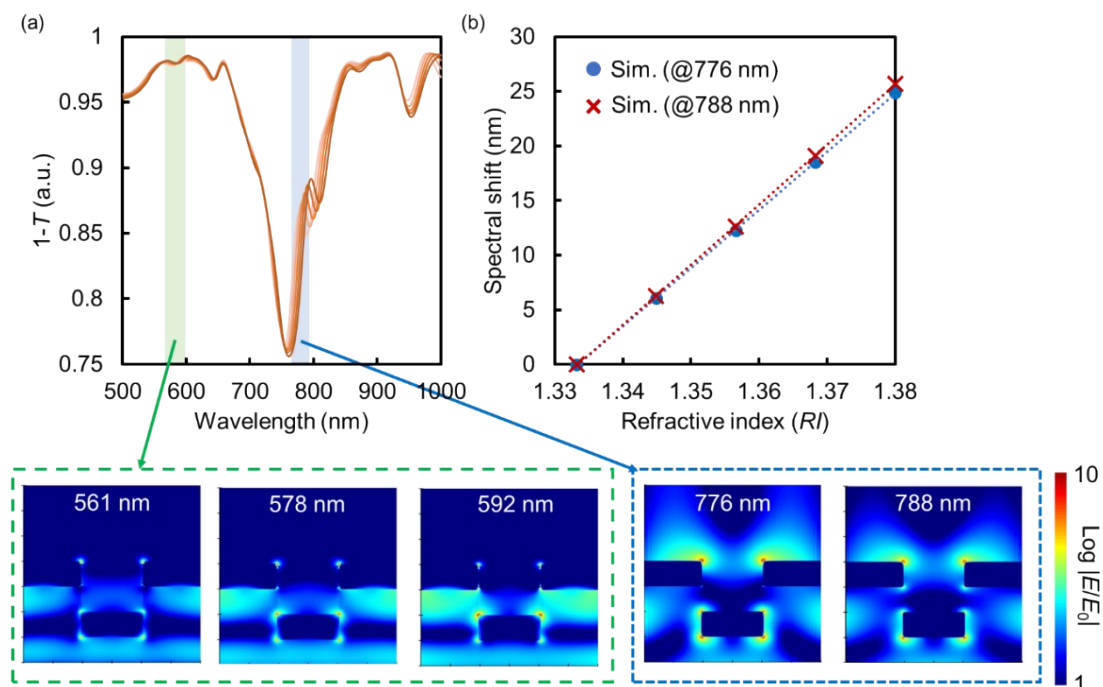

Fig. S2: (a) Absorption spectra with respect to an  $RI$  change and EM fields of the Au NHA. (b) Peak and dip shifts with respect to the  $RI$  at 776 and 788 nm simulated using the FDTD method. □

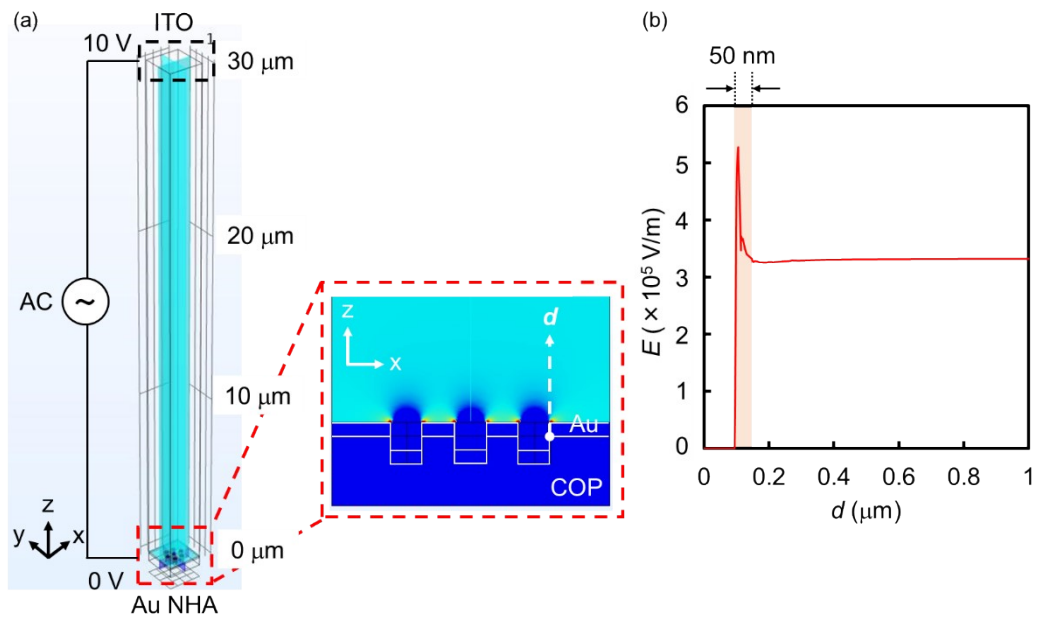

Fig. S3: ES field of the Au NHA-based DEP device obtained using FEM: (a) perspective and x-z views, (b) electrostatic field intensity ( $E$ ) versus distance ( $d$ ) from the bottom of the Au layer.

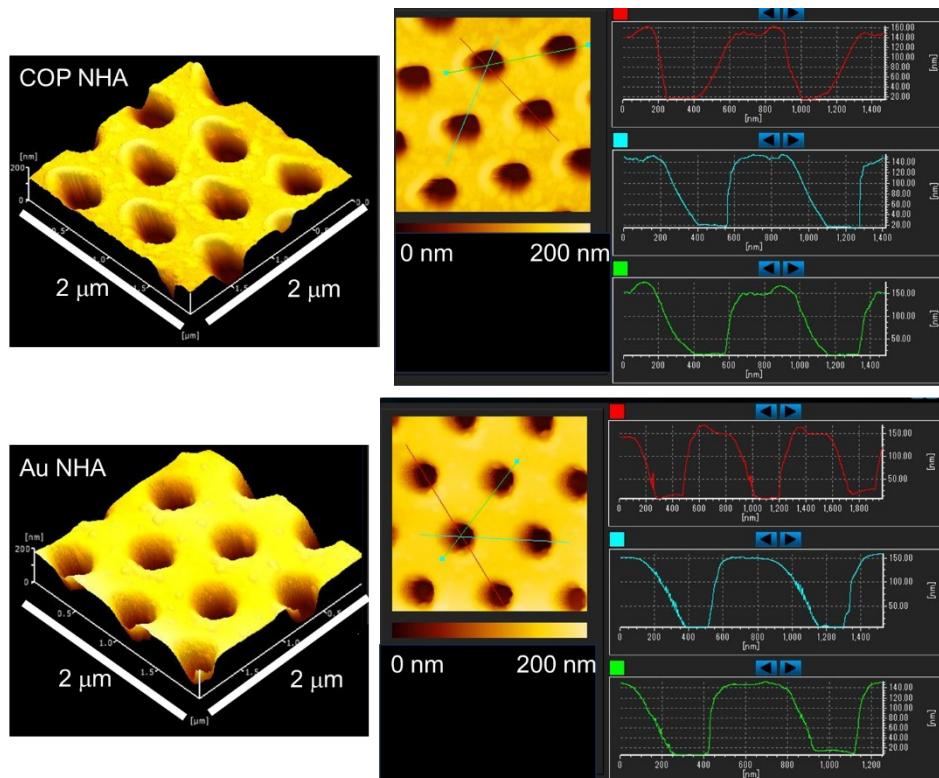

Fig. S4: AFM images of the nanohole-imprinted COP film and the fabricated Au NHA.

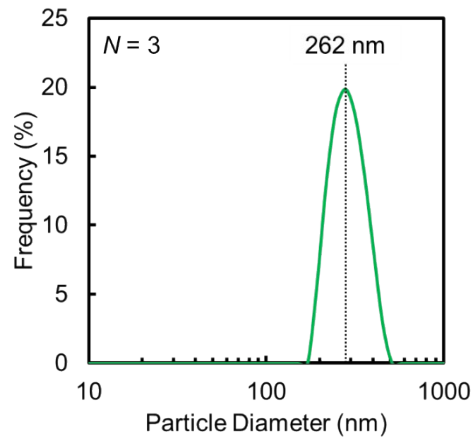

Fig. S5: Size distribution of the PS NPs measured using dynamic light scattering (DLS).

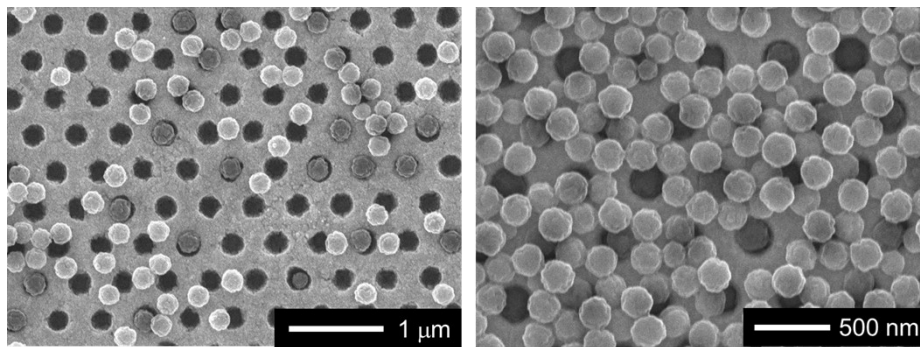

Fig. S6: SEM images of the trapped PS NPs by DEP after drying the sample dispersion.

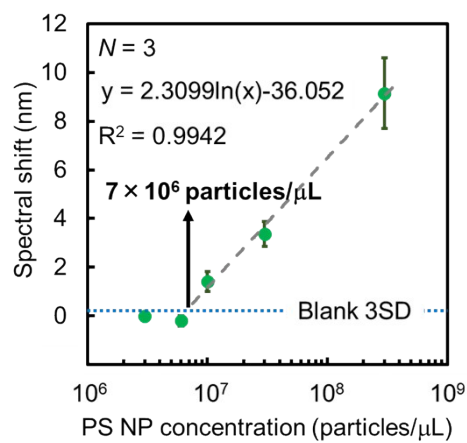

Fig. S7: Calibration curve of the PS NPs trapped on the Au NHAs.

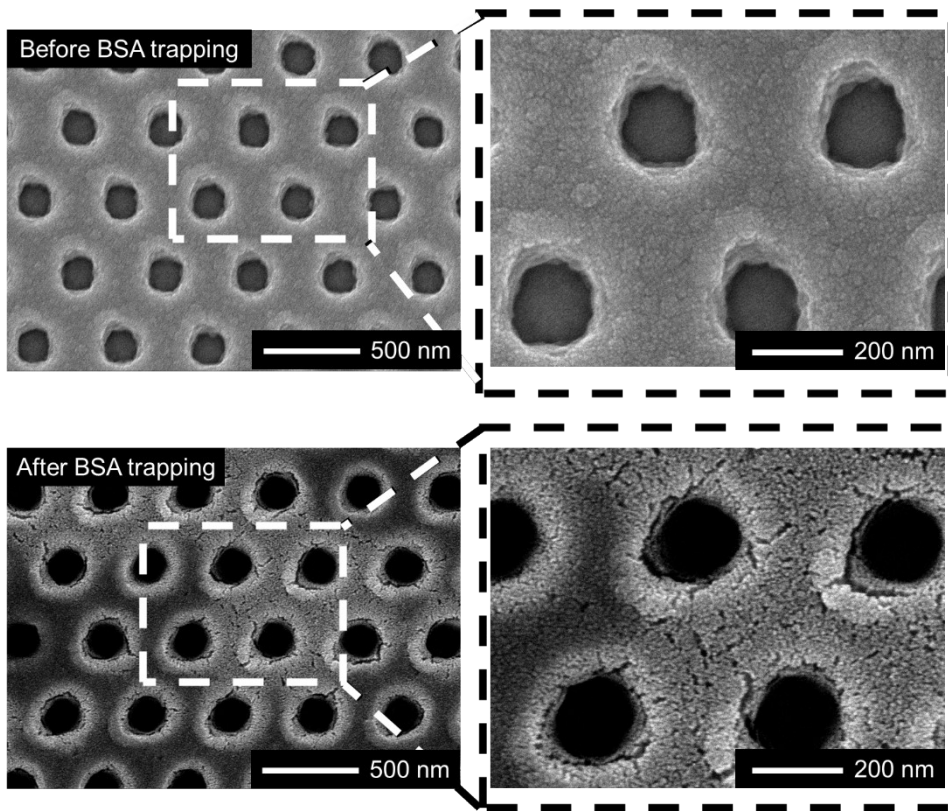

Fig. S8: SEM images of before and after the trapped BSA by DEP after drying the sample solution.
